# Supplementary material for: Longitudinal Analysis of Antimicrobial Resistance among Enterococcus Species Isolated from Australian Beef Cattle Faeces at Feedlot Entry and Exit
Source: MDPI journal article supplement (doi:10.3390/ani12192690), 2022-10-06
Supplement: s1 [file s1]

**Table S1.** Antimicrobial resistance profile of *Enterococcus faecium* and *E. hirae* isolated at entry and exit from the feedlot

| Antimicrobial             | Sample source and no. (%) of <i>Enterococcus</i> isolates |                        |                           |                        |
|---------------------------|-----------------------------------------------------------|------------------------|---------------------------|------------------------|
|                           | Feedlot (Entry)                                           |                        | Slaughter house (Exit)    |                        |
|                           | <i>E. faecium</i> (n=9)                                   | <i>E. hirae</i> (n=90) | <i>E. faecium</i> (n=117) | <i>E. hirae</i> (n=25) |
| Chloramphenicol           | 0                                                         | 0                      | 0                         | 0                      |
| Ciprofloxacin             | 77.8                                                      | 0                      | 9.4                       | 0                      |
| Daptomycin                | 11.1                                                      | 27.8                   | 17.9                      | 48                     |
| Erythromycin              | 11.1                                                      | 0                      | 2.56                      | 8                      |
| Gentamycin                | 0                                                         | 0                      | 0                         | 0                      |
| Kanamycin                 | 0                                                         | 0                      | 0.9                       | 0                      |
| Lincomycin                | 33.3                                                      | 61.1                   | 82.9                      | 84                     |
| Linezolid                 | 0                                                         | 0                      | 0                         | 0                      |
| Nitrofurantoin            | 22.2                                                      | 7.8                    | 61.5                      | 16                     |
| Penicillin                | 0                                                         | 0                      | 0                         | 0                      |
| Quinupristin/Dalfopristin | 22.2                                                      | 0                      | 21.4                      | 0                      |
| Streptomycin              | 0                                                         | 0                      | 0.9                       | 0                      |
| Tetracycline              | 33                                                        | 1.1                    | 5.1                       | 12                     |
| Tigecycline               | 0                                                         | 4.4                    | 0.9                       | 4                      |
| Tylosin tartrate          | 11                                                        | 0                      | 1.7                       | 8                      |
| Vancomycin                | 0                                                         | 0                      | 0                         | 0                      |

**Table S2.** Antimicrobial resistance pattern in *Enterococcus faecium* and *E. hirae* isolated at entry or exit from the feedlot

| Antimicrobial classes | Entry Resistance pattern (%) <sup>a</sup>                  |                                                           | Exit Resistance pattern (%) <sup>b</sup>                                                                                                                                                                 |                                                                    |
|-----------------------|------------------------------------------------------------|-----------------------------------------------------------|----------------------------------------------------------------------------------------------------------------------------------------------------------------------------------------------------------|--------------------------------------------------------------------|
|                       | <i>E. faecium</i> (n=9)                                    | <i>E. hirae</i> (n=90)                                    | <i>E. faecium</i> (n=117)                                                                                                                                                                                | <i>E. hirae</i> (n=25)                                             |
| All susceptible       | 0                                                          | 26 (28.9)                                                 | 0                                                                                                                                                                                                        | 4 (16)                                                             |
| 1                     | CIP, 3(33.3)<br>TET, 1 (11.1)                              | LIN, 35 (38.9)<br>DAP, 6 (6.7)<br>TIG, 2 (2.2)            | LIN, 32 (27.4)<br>NIT, 6 (5.1)                                                                                                                                                                           | LIN, 6 (24)                                                        |
| 2                     | CIP-NIT, 1 (11.1)<br>CIP-TET, 1 (11.1)                     | DAP-LIN 11 (12.2)<br>LIN-TIG, 2 (2.2)<br>DAP-NIT, 1 (1.1) | LIN-NIT , 26 (22.2)<br>LIN-Q/D, 9 (7.7)<br>CIP-NIT, 1 (0.8)<br>CIP-LIN, 1 (0.8)<br>DAP-NIT, 7(6.0)<br>LIN-TET, 1 (0.8)                                                                                   | DAP-LIN, 7 (28)<br>ERY-LIN-TYL, 1 (4)<br>LIN-NIT, 1 (4)            |
| 3                     | CIP-LIN-NIT, 1 (11.1)                                      | DAP-LIN-NIT, 6 (6.7)<br>DAP-LIN-TET, 1 (1.1)              | DAP-LIN-NIT, 6 (5.1)<br>CIP- LIN- NIT, 3 (2.6)<br>LIN-NIT-Q/D, 10 (8.5)<br>DAP-LIN-Q/D, 1 (0.8)<br>NIT-STR-TET, 1 (0.8)<br>CIP-DAP-NIT, 3 (2.6)<br>CIP-NIT-TIG, 1 (0.8)<br>LIN-NIT-TET, 1 (0.8)          | DAP-LIN-NIT, 2 (8)<br>DAP-LIN-TET, 2 (8)<br>ERY-LIN-TIG-TYL, 1 (4) |
| 4                     | ERY-LIN-Q/D-TET-TYL, 1 (11.1)<br>CIP-DAP-LIN-Q/D, 1 (11.1) |                                                           | CIP-DAP-LIN-NIT, 1 (0.8)<br>DAP-LIN-NIT-Q/D, 1 (0.8)<br>DAP-ERY-LIN-NIT, 1 (0.8)<br>KAN-LIN-NIT-Q/D, 1 (0.8)<br>LIN-NIT-Q/D-TET, 1 (0.8)<br>ERY-LIN-Q/D-TET-TYL, 1 (0.8)<br>ERY-LIN-NIT-TET-TYL, 1 (0.8) | DAP-LIN-NIT-TET, 1 (4)                                             |
| 5                     |                                                            |                                                           | CIP-DAP-LIN-NIT-Q/D, 1 (0.8)                                                                                                                                                                             |                                                                    |

|                |         |          |           |         |
|----------------|---------|----------|-----------|---------|
| MDR (%)        | 3(33.3) | 7 (7.8)  | 34 (29.1) | 6 (24)  |
| Resistance (%) | 9(100)  | 64(71.1) | 117(100)  | 21 (84) |

<sup>a</sup> Isolates from entry; <sup>b</sup> Isolates from exit; CIP, Ciprofloxacin; DAP, Daptomycin; ERY, Erythromycin; KAN, Kanamycin; LIN, Lincomycin; NIT, Nitrofurantoin; Q/D, Quinupristin/dalfopristin; STR, Streptomycin; TET, Tetracycline; TIG, Tigecycline; TYL, Tylosine tartrate

**Table S3.** The antimicrobial resistance phenotype and genotype of 62 *E. faecium* isolates obtained at entry and exit from feedlot cattle faecal samples and subjected to whole genome sequencing analysis

| Antimicrobial classes pattern | Total no. of isolates (%) |           | Resistance pattern (no. of isolates)                                                                                                                                                         |                                                                                                                                                                                                                                                                                                       |
|-------------------------------|---------------------------|-----------|----------------------------------------------------------------------------------------------------------------------------------------------------------------------------------------------|-------------------------------------------------------------------------------------------------------------------------------------------------------------------------------------------------------------------------------------------------------------------------------------------------------|
|                               | Phenotypic                | Genotypic | Phenotypic (MIC)                                                                                                                                                                             | Genotypic(resistance gene)                                                                                                                                                                                                                                                                            |
| 1                             | 20 (32.2)                 | 2 (3.2)   | CIP (3)<br>DAP (13)<br>LIN (4)                                                                                                                                                               | <i>aac(6')-Iid</i> (2)                                                                                                                                                                                                                                                                                |
| 2                             | 13(21.0)                  | 0         | CIP-LIN (1)<br>CIP-NIT (2)<br>CIP-TET (1)<br>Q/D-LIN (9)                                                                                                                                     |                                                                                                                                                                                                                                                                                                       |
| 3                             | 19 (30.6)                 | 28 (45.2) | CIP-LIN-NIT (4)<br>CIP-DAP-NIT (3)<br>CIP-TIG-NIT (1)<br>DAP-Q/D-LIN (1)<br>Q/D-LIN-NIT (10)                                                                                                 | <i>aac(6')-Ii ,eatAv, msr(C)</i> (25)<br><i>aac(6')-Ii, pbp5,msr(C)</i> (1)<br><i>aac(6')-Ii, efmA, pbp5</i> (1)<br><i>eatAv, efmA, msr(C)</i> (1)                                                                                                                                                    |
| 4                             | 9 (14.5)                  | 23 (37.1) | CIP-DAP-LIN-NIT (1)<br>CIP-DAP-Q/D-LIN (1)<br>DAP-ERY-LIN-NIT (1)<br>DAP-Q/D-LIN-NIT (1)<br>Q/D-KAN-LIN-NIT (1)<br>Q/D-LIN-NIT-TET (1)<br>ERY-Q/D-TYL-LIN-TET (2)<br>ERY-TYL-LIN-NIT-TET (1) | <i>aac(6')-Ii , eatAv, pbp5, msr(C),</i> (9)<br><i>aac(6')-Ii , efmA, pbp5, msr(C)</i> (11)<br><i>aac(6')-Ii , eatAv, lnu(G), msr(C)</i> (2)<br><i>aac(6')-Ii , eatAv, msr(C), tet(S)</i> (1)                                                                                                         |
| 5                             | 1 (1.6)                   | 5 (8.1)   | CIP-DAP-Q/D-LIN-NIT (1)                                                                                                                                                                      | <i>aac(6')-Ii , eatAv, efmA, pbp5, msr(C)</i> (5)                                                                                                                                                                                                                                                     |
| 6                             |                           | 4 (6.4)   |                                                                                                                                                                                              | <i>aac(6')-Ii , eatAv, efmA, pbp5, msr(C), tet(M),</i> (1)<br><i>aac(6')-Ii , eatAv, efmA, erm(B), msr(C), tet(L),tet(M), tet(45)</i> (1)<br><i>aac(6')-Ii ,ant(6)-Ia, eatAv, erm(B), pbp5, msr(C), tet(S), vat(E)</i> (1)<br><i>aac(6')-Ii, eatAv, efmA, erm(B),msr(C),tet(L),tet(M),tet(45)</i> (1) |
| Non-MDR                       | 33 (53.2)                 | 2 (3.2)   |                                                                                                                                                                                              |                                                                                                                                                                                                                                                                                                       |
| MDR                           | 29 (46.7)                 | 60 (96.8) |                                                                                                                                                                                              |                                                                                                                                                                                                                                                                                                       |
| Resistance                    | 62(100)                   | 62(100)   |                                                                                                                                                                                              |                                                                                                                                                                                                                                                                                                       |

CIP, Ciprofloxacin; DAP, Daptomycin; ERY, Erythromycin; KAN, Kanamycin; LIN, Lincomycin; NIT, Nitrofurantoin; Q/D, Quinupristin/dalfopristin; TET, Tetracycline; TIG, Tigecycline; TYL, Tylosin tartrate
